# Supplementary material for: Top-seeded solution growth and characterization of Raman crystal LiVMoO6
Source: Royal Society of Chemistry journal article supplement (doi:10.1039/c6ra24321e), 2016-01-01
Supplement: c6ra24321e1.pdf [file c6ra24321e1.pdf]

## Supporting information

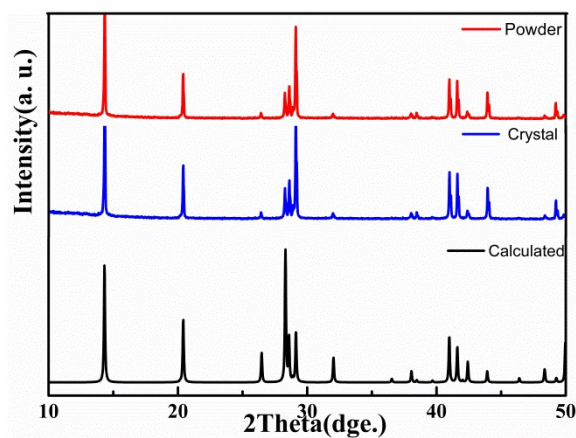

Fig. S1 Experimental and calculated powder X-ray diffraction patterns for polycrystalline and crystal  $\text{LiVMo}_6$

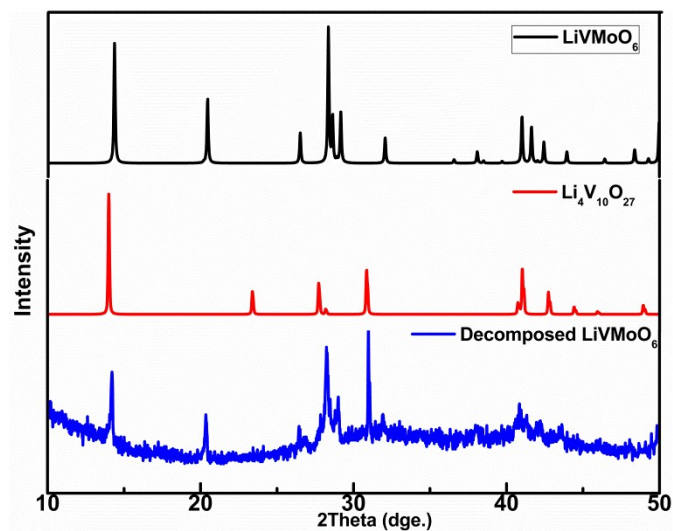

Fig. S2 Powder X-ray diffraction patterns for decomposed crystal  $\text{LiVMo}_6$ .

Table S1 Crystal data and structure refinement for monoclinic LiVMoO<sub>6</sub>

| Empirical formula                                       | LiVMoO <sub>6</sub>                                                                                                                  |
|---------------------------------------------------------|--------------------------------------------------------------------------------------------------------------------------------------|
| Formula weight/g·mol <sup>-1</sup>                      | 249.82                                                                                                                               |
| Temperature/K                                           | 296(2)                                                                                                                               |
| Wavelength/Å                                            | 0.71073                                                                                                                              |
| Crystal system, space group                             | Monoclinic, C2/m                                                                                                                     |
| Unit cell dimensions/Å                                  | $a=9.3531(9)$ , $b=3.6477(4)$ , $c=6.647(7)$<br>$b=3.6477(4)$<br>$\alpha(\text{deg})=90^\circ$<br>$\beta(\text{deg})=111.6430^\circ$ |
| Volume (Å <sup>3</sup> )                                | 210.79                                                                                                                               |
| Z                                                       | 2                                                                                                                                    |
| T(K)                                                    | 296                                                                                                                                  |
| Absorption coefficient, $\mu(\text{mm}^{-1})$           | 4.967                                                                                                                                |
| Theta range for data collection (°)                     | 3.3 to 22.52                                                                                                                         |
| Limiting indices                                        | $-12 \leq h \leq 12$ , $-4 \leq k \leq 4$ , $-8 \leq l \leq 8$                                                                       |
| $R(\text{int})$                                         | 0.0139                                                                                                                               |
| Independent reflection                                  | 1251                                                                                                                                 |
| Absorption correction                                   | Semi-empirical from equivalent                                                                                                       |
| Refinement method                                       | Full-matrix least-squares on F <sup>2</sup>                                                                                          |
| Goodness-of-fit on F <sup>2</sup>                       | 1.229                                                                                                                                |
| Final R indices [ $I > 2\sigma(I)$ ] <sup>a</sup>       | $R_1=0.0138$ , $wR_2=0.0334$                                                                                                         |
| R indices (all data)                                    | $R_1=0.0123$ , $wR_2=0.0332$                                                                                                         |
| Extinction coefficient                                  | 0.0179(16)                                                                                                                           |
| largest diff. peak and hole ( $e \cdot \text{Å}^{-3}$ ) | 0.190 and -0.207                                                                                                                     |

<sup>a</sup>  $R_1 = \sum ||F_o| - |F_c|| / \sum |F_o|$ ,  $wR_2 = \{ \sum [w(F_o^2 - F_c^2)^2] / \sum [w(F_o^2)^2] \}^{1/2}$

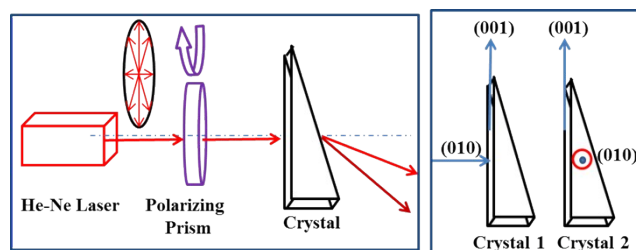

Fig. S3 Schematic of the experimental facilities to determined optical principle axes

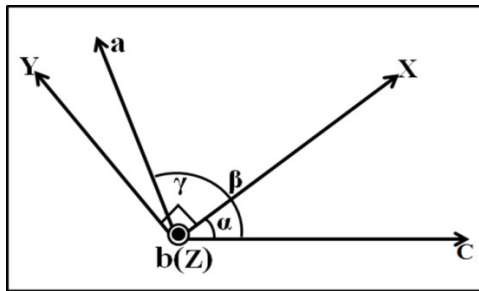

Fig. S4 Relative orientation of the optical axes ( $X$ ,  $Y$ , and  $Z$ ) with regard to the crystallographic axes ( $a$ ,  $b$ , and  $c$ ) for the monoclinic  $\text{LiVMoO}_6$  single crystals,  $\alpha=40^\circ$ ,  $\beta=111^\circ$ ,  $\gamma=90^\circ$

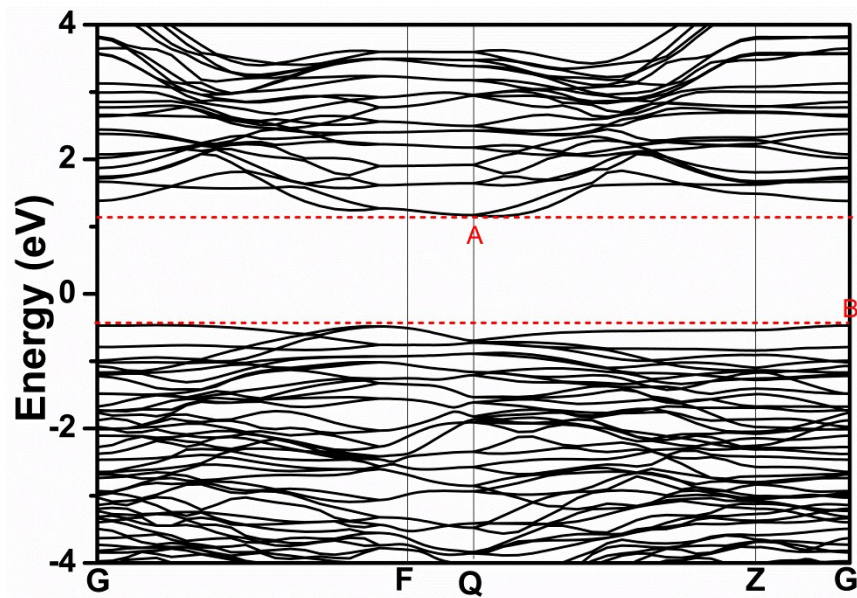

Fig. S5 The band structure of  $\text{LiVMoO}_6$  near Fermi level. The lowest CB and the highest VB located at “A” and “B” respectively.
